# Supplementary material
Source: publisher site journal article supplement (https://www.dovepress.com/article/550160)
Supplement: Supplementary file 1 [file Supplementary%20Tables_1.pd]

**Table S1. List of Included Cerebrospinal Fluid (CSF) Metabolites**

| <b>id</b>    | <b>Trait</b>                                                   |
|--------------|----------------------------------------------------------------|
| GCST90026002 | Bilirubin (z, z) levels                                        |
| GCST90026003 | Cholesterol levels                                             |
| GCST90026004 | Lysine levels                                                  |
| GCST90026005 | Tyrosine levels                                                |
| GCST90026006 | Pyroglutamine levels                                           |
| GCST90026007 | Cortisol levels                                                |
| GCST90026008 | Lactate levels                                                 |
| GCST90026009 | Sulfate levels                                                 |
| GCST90026010 | 1,5-anhydroglucitol (1,5-ag) levels                            |
| GCST90026011 | Kynurenine levels                                              |
| GCST90026012 | Asparagine levels                                              |
| GCST90026013 | Glycine levels                                                 |
| GCST90026014 | Proline levels                                                 |
| GCST90026015 | Ornithine levels                                               |
| GCST90026016 | Citrulline levels                                              |
| GCST90026017 | Acetoacetate levels                                            |
| GCST90026018 | Sphingomyelin (d18:1/14:0, d16:1/16:0) levels                  |
| GCST90026019 | Sphingomyelin (d18:1/18:1, d18:2/18:0) levels                  |
| GCST90026020 | Sphingomyelin (d18:1/20:0, d16:1/22:0) levels                  |
| GCST90026021 | Sphingomyelin (d18:1/20:1, d18:2/20:0) levels                  |
| GCST90026022 | Sphingomyelin (d18:1/22:1, d18:2/22:0, d16:1/24:0) levels      |
| GCST90026023 | Sphingomyelin (d18:1/24:1, d18:2/24:0) levels                  |
| GCST90026024 | Sphingomyelin (d18:2/16:0, d18:1/16:1) levels                  |
| GCST90026025 | Sphingomyelin (d18:2/24:1, d18:1/24:2) levels                  |
| GCST90026026 | Allantoin levels                                               |
| GCST90026027 | Alpha-ketoglutarate levels                                     |
| GCST90026028 | Dimethylglycine levels                                         |
| GCST90026029 | Glucuronate levels                                             |
| GCST90026030 | Glycerol 3-phosphate levels                                    |
| GCST90026031 | Hypoxanthine levels                                            |
| GCST90026032 | 3-indoxyl sulfate levels                                       |
| GCST90026033 | Inosine levels                                                 |
| GCST90026034 | Malate levels                                                  |
| GCST90026035 | Taurine levels                                                 |
| GCST90026036 | Uridine levels                                                 |
| GCST90026037 | Xanthine levels                                                |
| GCST90026038 | Phosphate levels                                               |
| GCST90026039 | 3-hydroxyisobutyrate levels                                    |
| GCST90026040 | 5-oxoproline levels                                            |
| GCST90026041 | P-cresol sulfate levels                                        |
| GCST90026042 | (N(1) + N(8))-acetylspermidine levels                          |
| GCST90026043 | 1,2-dipalmitoyl-gpc (16:0/16:0) levels                         |
| GCST90026044 | 1-(1-enyl-palmitoyl)-2-arachidonoyl-gpc (p-16:0/20:4n6) levels |
| GCST90026045 | 1-(1-enyl-palmitoyl)-2-oleoyl-gpc (p-16:0/18:1) levels         |
| GCST90026046 | 1-arachidonoyl-gpc (20:4n6) levels                             |

|              |                                                  |
|--------------|--------------------------------------------------|
| GCST90026047 | 1-linoleoyl-gpc (18:2) levels                    |
| GCST90026048 | 1-methylhistidine levels                         |
| GCST90026049 | 1-methylnicotinamide levels                      |
| GCST90026050 | 1-myristoyl-2-palmitoyl-gpc (14:0/16:0) levels   |
| GCST90026051 | 1-oleoyl-GPC (18:1) levels                       |
| GCST90026315 | X-23308 levels                                   |
| GCST90026316 | Ethyl beta-glucoopyranoside levels               |
| GCST90026317 | X-23587 levels                                   |
| GCST90026318 | X-23590 levels                                   |
| GCST90026319 | X-23593 levels                                   |
| GCST90026320 | X-23639 levels                                   |
| GCST90026321 | X-23644 levels                                   |
| GCST90026322 | X-23652 levels                                   |
| GCST90026323 | X-23739 levels                                   |
| GCST90026324 | X-24228 levels                                   |
| GCST90026325 | X-24295 levels                                   |
| GCST90026326 | 3-(3-amino-3-carboxypropyl)uridine levels        |
| GCST90026327 | X-24337 levels                                   |
| GCST90026328 | X-24431 levels                                   |
| GCST90026329 | X-24452 levels                                   |
| GCST90026330 | X-24686 levels                                   |
| GCST90026331 | X-24699 levels                                   |
| GCST90026332 | 3-amino-2-piperidone levels                      |
| GCST90026333 | X-24813 levels                                   |
| GCST90026334 | X-24952 levels                                   |
| GCST90026335 | X-25109 levels                                   |
| GCST90026336 | N6-methyllysine levels                           |
| GCST90025999 | Glucose levels                                   |
| GCST90026000 | Creatinine levels                                |
| GCST90026001 | Urate levels                                     |
| GCST90026052 | 1-palmitoyl-2-arachidonoyl-gpc (16:0/20:4n6) lev |
| GCST90026053 | 1-palmitoyl-2-docosahexaenoyl-gpc (16:0/22:6) le |
| GCST90026054 | 1-palmitoyl-2-linoleoyl-gpc (16:0/18:2) levels   |
| GCST90026055 | 1-palmitoyl-2-oleoyl-gpc (16:0/18:1) levels      |
| GCST90026056 | 1-palmitoyl-2-palmitoleoyl-gpc (16:0/16:1) level |
| GCST90026057 | 1-palmitoyl-2-stearoyl-gpc (16:0/18:0) levels    |
| GCST90026058 | 1-palmitoyl-2-stearoyl-gpc (16:0/18:0) levels    |
| GCST90026059 | 1-ribosyl-imidazoleacetate levels                |
| GCST90026060 | 1-stearoyl-2-arachidonoyl-gpc (18:0/20:4) levels |
| GCST90026061 | 1-stearoyl-2-docosahexaenoyl-gpc (18:0/22:6) lev |
| GCST90026062 | 1-stearoyl-2-linoleoyl-gpc (18:0/18:2) levels    |
| GCST90026063 | 1-stearoyl-2-oleoyl-gpc (18:0/18:1) levels       |
| GCST90026064 | 1-stearoyl-gpc (18:0) levels                     |
| GCST90026065 | 2'-deoxyuridine levels                           |
| GCST90026066 | 2'-o-methylcytidine levels                       |
| GCST90026067 | 2,3-dihydroxy-2-methylbutyrate levels            |
| GCST90026068 | 2,3-dihydroxyisovalerate levels                  |

|              |                                                  |
|--------------|--------------------------------------------------|
| GCST90026069 | 2-aminobutyrate levels                           |
| GCST90026070 | 2-aminophenol sulfate levels                     |
| GCST90026071 | 2-hydroxy-3-methylvalerate levels                |
| GCST90026072 | 2-hydroxyadipate levels                          |
| GCST90026073 | 2-hydroxybutyrate/2-hydroxyisobutyrate levels    |
| GCST90026074 | 2-hydroxyglutarate levels                        |
| GCST90026075 | 2-oxoadipate levels                              |
| GCST90026076 | 2-piperidinone levels                            |
| GCST90026077 | 3-(4-hydroxyphenyl)lactate levels                |
| GCST90026078 | 3-carboxy-4-methyl-5-propyl-2-furanpropanoate (c |
| GCST90026079 | 3-hydroxy-2-ethylpropionate levels               |
| GCST90026080 | 3-hydroxy-3-methylglutarate levels               |
| GCST90026081 | 3-hydroxybutyrate (bhba) levels                  |
| GCST90026082 | 3-hydroxyhexanoate levels                        |
| GCST90026083 | 3-hydroxyoctanoate levels                        |
| GCST90026084 | 3-hydroxypyridine sulfate levels                 |
| GCST90026085 | 3-hydroxystachydrine levels                      |
| GCST90026086 | 3-methoxytyramine sulfate levels                 |
| GCST90026087 | 3-methoxytyrosine levels                         |
| GCST90026088 | 3-methyl-2-oxobutyrate levels                    |
| GCST90026089 | 3-methyl-2-oxovalerate levels                    |
| GCST90026090 | 3-methylglutaconate levels                       |
| GCST90026091 | 3-methylglutaryl carnitine (2) levels            |
| GCST90026092 | 3-methylhistidine levels                         |
| GCST90026093 | 3-methylxanthine levels                          |
| GCST90026094 | 3-ureidopropionate levels                        |
| GCST90026095 | 4-acetamidobutanoate levels                      |
| GCST90026096 | 4-methyl-2-oxopentanoate levels                  |
| GCST90026097 | 4-methylcatechol sulfate levels                  |
| GCST90026098 | 5,6-dihydrothymine levels                        |
| GCST90026099 | 5,6-dihydrouridine levels                        |
| GCST90026100 | 5-acetylamino-6-amino-3-methyluracil levels      |
| GCST90026101 | 5-hydroxyhexanoate levels                        |
| GCST90026102 | 5-hydroxyindoleacetate levels                    |
| GCST90026103 | 5-methylcytidine levels                          |
| GCST90026104 | 5-methylthioadenosine (mta) levels               |
| GCST90026105 | 5-methyluridine (ribothymidine) levels           |
| GCST90026106 | 6-oxopiperidine-2-carboxylate levels             |
| GCST90026107 | 7-alpha-hydroxy-3-oxo-4-cholestenoate (7-hoca) l |
| GCST90026108 | 7-methylguanine levels                           |
| GCST90026109 | 7-methylxanthine levels                          |
| GCST90026110 | Acetylcarnitine (c2) levels                      |
| GCST90026111 | Acisoga levels                                   |
| GCST90026112 | Adenine levels                                   |
| GCST90026113 | Adenosine 3',5'-cyclic monophosphate (camp) leve |
| GCST90026114 | Alanine levels                                   |
| GCST90026115 | Alpha-hydroxyisocaproate levels                  |

|              |                                                  |
|--------------|--------------------------------------------------|
| GCST90026116 | Alpha-hydroxyisovalerate levels                  |
| GCST90026117 | Alpha-ketoglutaramate levels                     |
| GCST90026118 | Alpha-tocopherol levels                          |
| GCST90026119 | Arabinose levels                                 |
| GCST90026120 | Arabitol/xylitol levels                          |
| GCST90026121 | Arabonate/xylonate levels                        |
| GCST90026122 | Arachidonate (20:4n6) levels                     |
| GCST90026123 | Argininate levels                                |
| GCST90026124 | Arginine levels                                  |
| GCST90026125 | Argininosuccinate levels                         |
| GCST90026126 | Ascorbate (vitamin c) levels                     |
| GCST90026290 | X-11795 levels                                   |
| GCST90026291 | X-12007 levels                                   |
| GCST90026292 | X-12015 levels                                   |
| GCST90026293 | X-12100 levels                                   |
| GCST90026294 | X-12101 levels                                   |
| GCST90026295 | X-12104 levels                                   |
| GCST90026296 | Ascorbic acid 3-sulfate levels                   |
| GCST90026297 | X-12411 levels                                   |
| GCST90026298 | X-12906 levels                                   |
| GCST90026299 | 1-carboxyethylvaline levels                      |
| GCST90026300 | X-13728 levels                                   |
| GCST90026301 | X-14056 levels                                   |
| GCST90026302 | 1-methyl-5-imidazoleacetate levels               |
| GCST90026303 | X-15245 levels                                   |
| GCST90026304 | 1-carboxyethylphenylalanine levels               |
| GCST90026305 | X-15674 levels                                   |
| GCST90026306 | N,n,n-trimethyl-alanylproline betaine (tmap) lev |
| GCST90026307 | X-18887 levels                                   |
| GCST90026308 | X-19438 levels                                   |
| GCST90026309 | X-21286 levels                                   |
| GCST90026310 | Butyrate (4:0) levels                            |
| GCST90026311 | X-21733 levels                                   |
| GCST90026312 | 2-o-methylascorbic acid levels                   |
| GCST90026313 | X-22162 levels                                   |
| GCST90026314 | 4-chlorobenzoic acid levels                      |
| GCST90026202 | Methylsuccinoylcarnitine levels                  |
| GCST90026203 | Myo-inositol levels                              |
| GCST90026204 | N-acetyl-3-methylhistidine levels                |
| GCST90026205 | N-acetyl-aspartyl-glutamate (naag) levels        |
| GCST90026206 | N-acetyl-beta-alanine levels                     |
| GCST90026207 | N-acetyl-isoputreanine levels                    |
| GCST90026208 | N-acetyllalanine levels                          |
| GCST90026209 | N-acetylarginine levels                          |
| GCST90026210 | N-acetylasparagine levels                        |
| GCST90026211 | N-acetylaspartate (naa) levels                   |
| GCST90026212 | N-acetylglucosamine/n-acetylgalactosamine levels |

|              |                                                    |
|--------------|----------------------------------------------------|
| GCST90026213 | N-acetylglutamate levels                           |
| GCST90026214 | N-acetylglutamine levels                           |
| GCST90026215 | N-acetylglycine levels                             |
| GCST90026216 | N-acetylhistidine levels                           |
| GCST90026217 | N-acetylisoleucine levels                          |
| GCST90026218 | N-acetylleucine levels                             |
| GCST90026219 | N-acetylmethionine levels                          |
| GCST90026220 | N-acetylneuraminate levels                         |
| GCST90026221 | N-acetylphenylalanine levels                       |
| GCST90026222 | N-acetylputrescine levels                          |
| GCST90026223 | N-acetylserine levels                              |
| GCST90026224 | N-acetyltaurine levels                             |
| GCST90026225 | N-acetylthreonine levels                           |
| GCST90026226 | N-acetylvaline levels                              |
| GCST90026227 | N-delta-acetylornithine levels                     |
| GCST90026228 | N-formylanthranilic acid levels                    |
| GCST90026229 | N-formylmethionine levels                          |
| GCST90026230 | N-trimethyl 5-aminovalerate levels                 |
| GCST90026231 | N1-methyl-2-pyridone-5-carboxamide levels          |
| GCST90026232 | N1-methyladenosine levels                          |
| GCST90026233 | N1-methylinosine levels                            |
| GCST90026234 | N2,n2-dimethylguanosine levels                     |
| GCST90026235 | N6,n6,n6-trimethyllysine levels                    |
| GCST90026236 | N6-carbamoylthreonyladenosine levels               |
| GCST90026237 | N6-succinyladenosine levels                        |
| GCST90026238 | Nicotinamide riboside levels                       |
| GCST90026239 | O-sulfo-l-tyrosine levels                          |
| GCST90026240 | Octanoylcarnitine (c8) levels                      |
| GCST90026241 | Orotate levels                                     |
| GCST90026242 | Orotidine levels                                   |
| GCST90026243 | Oxalate (ethanedioate) levels                      |
| GCST90026244 | Palmitoyl dihydrosphingomyelin (d18:0/16:0) levels |
| GCST90026245 | Palmitoyl sphingomyelin (d18:1/16:0) levels        |
| GCST90026246 | Pantothenate levels                                |
| GCST90026247 | Phenol sulfate levels                              |
| GCST90026248 | Phenylacetylglutamine levels                       |
| GCST90026249 | Phenylalanine levels                               |
| GCST90026250 | Phenyllactate (pla) levels                         |
| GCST90026251 | Pipecolate levels                                  |
| GCST90026152 | Dimethylarginine (sdma + adma) levels              |
| GCST90026153 | Dimethylmalonic acid levels                        |
| GCST90026154 | Dopamine 3-o-sulfate levels                        |
| GCST90026155 | Ergothioneine levels                               |
| GCST90026156 | Erythritol levels                                  |
| GCST90026157 | Erythronate levels                                 |
| GCST90026158 | Ethylmalonate levels                               |
| GCST90026159 | Fructose levels                                    |

|              |                                            |
|--------------|--------------------------------------------|
| GCST90026160 | Galactonate levels                         |
| GCST90026161 | Galactosylglycerol levels                  |
| GCST90026162 | Gamma-glutamyl-alpha-lysine levels         |
| GCST90026163 | Gamma-glutamylglutamine levels             |
| GCST90026164 | Gamma-glutamylleucine levels               |
| GCST90026165 | Gamma-glutamylphenylalanine levels         |
| GCST90026166 | Gamma-glutamylthreonine levels             |
| GCST90026167 | Gamma-glutamylvaline levels                |
| GCST90026168 | Gluconate levels                           |
| GCST90026169 | Glutamate levels                           |
| GCST90026170 | Glutamine levels                           |
| GCST90026171 | Glutarylcarntine (c5-dc) levels            |
| GCST90026172 | Glycerate levels                           |
| GCST90026173 | Glycerol levels                            |
| GCST90026174 | Glycerophosphoinositol levels              |
| GCST90026175 | Guaiacol sulfate levels                    |
| GCST90026176 | Guanosine levels                           |
| GCST90026127 | Behenoyl sphingomyelin (d18:1/22:0) levels |
| GCST90026128 | Benzoate levels                            |
| GCST90026129 | Beta-alanine levels                        |
| GCST90026130 | Beta-citrylglutamate levels                |
| GCST90026131 | Beta-hydroxyisovalerate levels             |
| GCST90026132 | Betaine levels                             |
| GCST90026133 | C-glycosyltryptophan levels                |
| GCST90026134 | Caffeine levels                            |
| GCST90026135 | Carboxyethyl-gaba levels                   |
| GCST90026136 | Carnitine levels                           |
| GCST90026137 | Catechol sulfate levels                    |
| GCST90026138 | Choline levels                             |
| GCST90026139 | Choline phosphate levels                   |
| GCST90026140 | Citramalate levels                         |
| GCST90026141 | Citrate levels                             |
| GCST90026142 | Cortisone levels                           |
| GCST90026143 | Creatine levels                            |
| GCST90026144 | Cys-gly, oxidized levels                   |
| GCST90026145 | Cysteine levels                            |
| GCST90026146 | Cysteinylglycine levels                    |
| GCST90026147 | Cysteinylglycine disulfide levels          |
| GCST90026148 | Cytidine levels                            |
| GCST90026149 | Deoxycarnitine levels                      |
| GCST90026150 | Diglycerol levels                          |
| GCST90026151 | Dimethyl sulfone levels                    |
| GCST90026177 | Gulonate levels                            |
| GCST90026178 | Hippurate levels                           |
| GCST90026179 | Histidine levels                           |
| GCST90026180 | Homoarginine levels                        |
| GCST90026181 | Homocarnosine levels                       |

|              |                                              |
|--------------|----------------------------------------------|
| GCST90026182 | Homostachydrine levels                       |
| GCST90026183 | Homovanillate (hva) levels                   |
| GCST90026184 | Hydroxy-cmpf levels                          |
| GCST90026185 | Hydroxyasparagine levels                     |
| GCST90026186 | Indoleacetate levels                         |
| GCST90026187 | Isobutyrylcarnitine (c4) levels              |
| GCST90026188 | Isocitrate levels                            |
| GCST90026189 | Isoleucine levels                            |
| GCST90026190 | Isovalerate (i5:0) levels                    |
| GCST90026191 | Kynurenate levels                            |
| GCST90026192 | Leucine levels                               |
| GCST90026193 | Maleate levels                               |
| GCST90026194 | Mannitol/sorbitol levels                     |
| GCST90026195 | Mannose levels                               |
| GCST90026196 | Methionine levels                            |
| GCST90026197 | Methionine sulfone levels                    |
| GCST90026198 | Methionine sulfoxide levels                  |
| GCST90026199 | Methyl glucopyranoside (alpha + beta) levels |
| GCST90026200 | Methylmalonate (mma) levels                  |
| GCST90026201 | Methylsuccinate levels                       |
| GCST90026252 | Propionylcarnitine (c3) levels               |
| GCST90026253 | Pseudouridine levels                         |
| GCST90026254 | Pyridoxal levels                             |
| GCST90026255 | Pyridoxate levels                            |
| GCST90026256 | Pyruvate levels                              |
| GCST90026257 | Quinate levels                               |
| GCST90026258 | Ribitol levels                               |
| GCST90026259 | Ribonate levels                              |
| GCST90026260 | Ribulonate/xylulonate levels                 |
| GCST90026261 | S-1-pyrroline-5-carboxylate levels           |
| GCST90026262 | S-methylcysteine levels                      |
| GCST90026263 | Salicylate levels                            |
| GCST90026264 | Serine levels                                |
| GCST90026265 | Spermidine levels                            |
| GCST90026266 | Stachydrine levels                           |
| GCST90026267 | Stearoyl sphingomyelin (d18:1/18:0) levels   |
| GCST90026268 | Succinimide levels                           |
| GCST90026269 | Succinylcarnitine (c4-dc) levels             |
| GCST90026270 | Tartarate levels                             |
| GCST90026271 | Tartronate (hydroxymalonate) levels          |
| GCST90026272 | Theobromine levels                           |
| GCST90026273 | Theophylline levels                          |
| GCST90026274 | Thioprolinone levels                         |
| GCST90026275 | Threonate levels                             |
| GCST90026276 | Threonine levels                             |
| GCST90026277 | Trans-4-hydroxyproline levels                |
| GCST90026278 | Trigonelline (n'-methylnicotinate) levels    |

|              |                                                 |
|--------------|-------------------------------------------------|
| GCST90026279 | Trimethylamine n-oxide levels                   |
| GCST90026280 | Tryptophan levels                               |
| GCST90026281 | Tryptophan betaine levels                       |
| GCST90026282 | Uracil levels                                   |
| GCST90026283 | Urea levels                                     |
| GCST90026284 | Valine levels                                   |
| GCST90026285 | X-10457 levels                                  |
| GCST90026286 | X-11261 levels                                  |
| GCST90026287 | 2,3-dihydroxy-5-methylthio-4-pentenoate (dmtpa) |
| GCST90026288 | X-11612 levels                                  |
| GCST90026289 | X-11787 levels                                  |

**Table S2. Complete Mendelian Randomization Results**

| <b>ID</b>    | <b>Reported Trait</b>       | <b>method</b>    | <b>nsnp</b> | <b>b</b> |
|--------------|-----------------------------|------------------|-------------|----------|
| GCST90026004 | Lysine levels               | MR Egger         | 49          | 0.033778 |
| GCST90026004 | Lysine levels               | Weighted median  | 49          | 0.015226 |
| GCST90026004 | Lysine levels               | Inverse variance | 49          | 0.015091 |
| GCST90026004 | Lysine levels               | Simple mode      | 49          | 0.012246 |
| GCST90026004 | Lysine levels               | Weighted mode    | 49          | 0.026164 |
| GCST90026011 | Kynurenine levels           | MR Egger         | 49          | 0.014351 |
| GCST90026011 | Kynurenine levels           | Weighted median  | 49          | 0.024271 |
| GCST90026011 | Kynurenine levels           | Inverse variance | 49          | 0.024714 |
| GCST90026011 | Kynurenine levels           | Simple mode      | 49          | 0.012671 |
| GCST90026011 | Kynurenine levels           | Weighted mode    | 49          | 0.025079 |
| GCST90026091 | 3-methylglutarylcarnitine   | MR Egger         | 49          | 0.059665 |
| GCST90026091 | 3-methylglutarylcarnitine   | Weighted median  | 49          | 0.005615 |
| GCST90026091 | 3-methylglutarylcarnitine   | Inverse variance | 49          | 0.029301 |
| GCST90026091 | 3-methylglutarylcarnitine   | Simple mode      | 49          | 0.02463  |
| GCST90026091 | 3-methylglutarylcarnitine   | Weighted mode    | 49          | 0.010453 |
| GCST90026121 | Arabonate/xylonate levels   | MR Egger         | 49          | 0.010438 |
| GCST90026121 | Arabonate/xylonate levels   | Weighted median  | 49          | -0.01696 |
| GCST90026121 | Arabonate/xylonate levels   | Inverse variance | 49          | -0.02347 |
| GCST90026121 | Arabonate/xylonate levels   | Simple mode      | 49          | 0.006997 |
| GCST90026121 | Arabonate/xylonate levels   | Weighted mode    | 49          | -0.01205 |
| GCST90026122 | Arachidonate (20:4n6) level | MR Egger         | 49          | 0.102497 |
| GCST90026122 | Arachidonate (20:4n6) level | Weighted median  | 49          | 0.104504 |
| GCST90026122 | Arachidonate (20:4n6) level | Inverse variance | 49          | 0.086644 |
| GCST90026122 | Arachidonate (20:4n6) level | Simple mode      | 49          | 0.144029 |
| GCST90026122 | Arachidonate (20:4n6) level | Weighted mode    | 49          | 0.119883 |
| GCST90026190 | Isovalerate (i5:0) levels   | MR Egger         | 49          | 0.103656 |
| GCST90026190 | Isovalerate (i5:0) levels   | Weighted median  | 49          | 0.099851 |
| GCST90026190 | Isovalerate (i5:0) levels   | Inverse variance | 49          | 0.071158 |
| GCST90026190 | Isovalerate (i5:0) levels   | Simple mode      | 49          | 0.072157 |
| GCST90026190 | Isovalerate (i5:0) levels   | Weighted mode    | 49          | 0.092599 |
| GCST90026201 | Methylsuccinate levels      | MR Egger         | 49          | -0.15118 |
| GCST90026201 | Methylsuccinate levels      | Weighted median  | 49          | -0.11049 |
| GCST90026201 | Methylsuccinate levels      | Inverse variance | 49          | -0.07176 |
| GCST90026201 | Methylsuccinate levels      | Simple mode      | 49          | -0.11711 |
| GCST90026201 | Methylsuccinate levels      | Weighted mode    | 49          | -0.12108 |
| GCST90026203 | Myo-inositol levels         | MR Egger         | 49          | -0.03617 |
| GCST90026203 | Myo-inositol levels         | Weighted median  | 49          | -0.00698 |
| GCST90026203 | Myo-inositol levels         | Inverse variance | 49          | 0.027678 |
| GCST90026203 | Myo-inositol levels         | Simple mode      | 49          | -0.00352 |
| GCST90026203 | Myo-inositol levels         | Weighted mode    | 49          | -0.01103 |

| <b>se</b> | <b>pval</b> | <b>lo_ci</b> | <b>up_ci</b> | <b>or</b> | <b>or_lci95</b> | <b>or_uci95</b> |
|-----------|-------------|--------------|--------------|-----------|-----------------|-----------------|
| 0.012414  | 0.009097    | 0.009447     | 0.058109     | 1.034355  | 1.009492        | 1.05983         |
| 0.009391  | 0.104939    | -0.00318     | 0.033632     | 1.015342  | 0.996825        | 1.034204        |
| 0.006711  | 0.024521    | 0.001939     | 0.028244     | 1.015206  | 1.00194         | 1.028647        |
| 0.021696  | 0.575077    | -0.03028     | 0.05477      | 1.012321  | 0.970176        | 1.056297        |
| 0.015867  | 0.105688    | -0.00494     | 0.057263     | 1.026509  | 0.995077        | 1.058934        |
| 0.019507  | 0.465593    | -0.02388     | 0.052585     | 1.014454  | 0.976399        | 1.053993        |
| 0.016891  | 0.150746    | -0.00884     | 0.057378     | 1.024568  | 0.991203        | 1.059057        |
| 0.010252  | 0.015922    | 0.00462      | 0.044808     | 1.025022  | 1.004631        | 1.045827        |
| 0.03182   | 0.692251    | -0.0497      | 0.075038     | 1.012751  | 0.951518        | 1.077925        |
| 0.020505  | 0.227292    | -0.01511     | 0.065269     | 1.025396  | 0.985002        | 1.067446        |
| 0.027666  | 0.036184    | 0.005439     | 0.11389      | 1.061481  | 1.005454        | 1.120629        |
| 0.023904  | 0.814304    | -0.04124     | 0.052467     | 1.00563   | 0.959601        | 1.053868        |
| 0.014646  | 0.045432    | 0.000595     | 0.058007     | 1.029735  | 1.000595        | 1.059723        |
| 0.043814  | 0.576638    | -0.06125     | 0.110505     | 1.024935  | 0.940592        | 1.116842        |
| 0.029013  | 0.720201    | -0.04641     | 0.067319     | 1.010508  | 0.954649        | 1.069636        |
| 0.020459  | 0.612322    | -0.02966     | 0.050538     | 1.010492  | 0.970773        | 1.051837        |
| 0.019462  | 0.383659    | -0.0551      | 0.021191     | 0.983188  | 0.946389        | 1.021417        |
| 0.010966  | 0.032312    | -0.04497     | -0.00198     | 0.976801  | 0.95603         | 0.998022        |
| 0.033519  | 0.835528    | -0.0587      | 0.072693     | 1.007021  | 0.94299         | 1.075401        |
| 0.021849  | 0.583963    | -0.05487     | 0.030778     | 0.988026  | 0.946608        | 1.031257        |
| 0.05827   | 0.085089    | -0.01171     | 0.216706     | 1.107934  | 0.988355        | 1.24198         |
| 0.051466  | 0.042301    | 0.003631     | 0.205377     | 1.110159  | 1.003637        | 1.227987        |
| 0.03039   | 0.004357    | 0.02708      | 0.146209     | 1.090509  | 1.02745         | 1.157438        |
| 0.09142   | 0.121716    | -0.03515     | 0.323212     | 1.154918  | 0.965457        | 1.381559        |
| 0.059928  | 0.051124    | 0.002425     | 0.237341     | 1.127365  | 1.002428        | 1.267874        |
| 0.047041  | 0.032495    | 0.011455     | 0.195857     | 1.109219  | 1.011521        | 1.216353        |
| 0.039722  | 0.011945    | 0.021997     | 0.177705     | 1.105006  | 1.02224         | 1.194473        |
| 0.024956  | 0.004353    | 0.022245     | 0.120072     | 1.073751  | 1.022494        | 1.127578        |
| 0.078681  | 0.363685    | -0.08206     | 0.226371     | 1.074824  | 0.921219        | 1.254041        |
| 0.056596  | 0.108351    | -0.01833     | 0.203527     | 1.097022  | 0.981838        | 1.225718        |
| 0.062447  | 0.019394    | -0.27358     | -0.02879     | 0.85969   | 0.760653        | 0.971623        |
| 0.047554  | 0.020151    | -0.2037      | -0.01729     | 0.895393  | 0.815709        | 0.982861        |
| 0.033054  | 0.029943    | -0.13654     | -0.00697     | 0.930758  | 0.87237         | 0.993055        |
| 0.100475  | 0.249562    | -0.31404     | 0.079824     | 0.88949   | 0.730491        | 1.083096        |
| 0.067214  | 0.077932    | -0.25281     | 0.010664     | 0.885967  | 0.776612        | 1.010721        |
| 0.025523  | 0.163022    | -0.0862      | 0.013854     | 0.964475  | 0.917413        | 1.013951        |
| 0.020704  | 0.736134    | -0.04756     | 0.033603     | 0.993047  | 0.953556        | 1.034174        |
| 0.01369   | 0.043196    | 0.000846     | 0.05451      | 1.028065  | 1.000846        | 1.056023        |
| 0.044629  | 0.937507    | -0.09099     | 0.083956     | 0.996489  | 0.913026        | 1.087581        |
| 0.026056  | 0.673892    | -0.0621      | 0.040037     | 0.989029  | 0.939788        | 1.040849        |

**Table S3. Sensitivity Analyses for Heterogeneity and Horizontal Pleiotropy**

| <b>ID</b>    | <b>Reported Trait</b> | <b>method</b> | <b>Q</b> | <b>Q_df</b> | <b>Q_pval</b> |
|--------------|-----------------------|---------------|----------|-------------|---------------|
| GCST90026004 | Lysine levels         | MR Egger      | 52.40425 | 47          | 0.272402      |
| GCST90026004 | Lysine levels         | Inverse v     | 55.91185 | 48          | 0.202088      |
| GCST90026011 | Kynurenine levels     | MR Egger      | 49.99468 | 47          | 0.355309      |
| GCST90026011 | Kynurenine levels     | Inverse v     | 50.41148 | 48          | 0.378302      |
| GCST90026091 | 3-methylglutarylca    | MR Egger      | 48.87157 | 47          | 0.397764      |
| GCST90026091 | 3-methylglutarylca    | Inverse v     | 50.60252 | 48          | 0.371164      |
| GCST90026121 | Arabonate/xylonate    | MR Egger      | 46.09463 | 47          | 0.509991      |
| GCST90026121 | Arabonate/xylonate    | Inverse v     | 49.8911  | 48          | 0.398041      |
| GCST90026122 | Arachidonate (20:4    | MR Egger      | 49.23125 | 47          | 0.383938      |
| GCST90026122 | Arachidonate (20:4    | Inverse v     | 49.3385  | 48          | 0.419445      |
| GCST90026190 | Isovalerate (i5:0)    | MR Egger      | 43.50756 | 47          | 0.61802       |
| GCST90026190 | Isovalerate (i5:0)    | Inverse v     | 44.17174 | 48          | 0.630452      |
| GCST90026201 | Methylsuccinate le    | MR Egger      | 37.20489 | 47          | 0.846224      |
| GCST90026201 | Methylsuccinate le    | Inverse v     | 39.45237 | 48          | 0.805422      |
| GCST90026203 | Myo-inositol level    | MR Egger      | 40.86903 | 47          | 0.72326       |
| GCST90026203 | Myo-inositol level    | Inverse v     | 49.54525 | 48          | 0.411387      |

| <b>Egger_intise</b> |          | <b>pval</b> |
|---------------------|----------|-------------|
| -0.00558            | 0.003146 | 0.082598    |
| 0.00309             | 0.004937 | 0.534367    |
| -0.00902            | 0.006993 | 0.203287    |
| -0.01007            | 0.005168 | 0.057345    |
| -0.00472            | 0.014735 | 0.750394    |
| -0.00972            | 0.011929 | 0.419197    |
| 0.023726            | 0.015826 | 0.14052     |
| 0.019017            | 0.006456 | 0.005001    |

**Table S4.** MR-PRESSO Global Test and Outlier Detection Results

| <b>ID</b>    | <b>Reported Trait</b>  | <b>MR Analysis</b> | <b>Causal EstimSd</b> |           |
|--------------|------------------------|--------------------|-----------------------|-----------|
| GCST90026004 | Lysine levels          | Raw                | 0.01509145            | 0.0067107 |
| GCST90026004 | Lysine levels          | Outlier-correc     | NA                    | NA        |
| GCST90026011 | Kynurenine levels      | Raw                | 0.02471407            | 0.0102518 |
| GCST90026011 | Kynurenine levels      | Outlier-correc     | NA                    | NA        |
| GCST90026091 | 3-methylglutarylcarnit | Raw                | 0.02930113            | 0.0146459 |
| GCST90026091 | 3-methylglutarylcarnit | Outlier-correc     | NA                    | NA        |
| GCST90026121 | Arabonate/xylonate lev | Raw                | -0.02347264           | 0.0109658 |
| GCST90026121 | Arabonate/xylonate lev | Outlier-correc     | NA                    | NA        |
| GCST90026122 | Arachidonate (20:4n6)  | Raw                | 0.08664419            | 0.03039   |
| GCST90026122 | Arachidonate (20:4n6)  | Outlier-correc     | NA                    | NA        |
| GCST90026190 | Isovalerate (i5:0) lev | Raw                | 0.0711581             | 0.02394   |
| GCST90026190 | Isovalerate (i5:0) lev | Outlier-correc     | NA                    | NA        |
| GCST90026201 | Methylsuccinate levels | Raw                | -0.07175561           | 0.029967  |
| GCST90026201 | Methylsuccinate levels | Outlier-correc     | NA                    | NA        |
| GCST90026203 | Myo-inositol levels    | Raw                | 0.02767808            | 0.0136898 |
| GCST90026203 | Myo-inositol levels    | Outlier-correc     | NA                    | NA        |

| <b>T-stat</b> | <b>P-value</b> | <b>RSSobs</b> | <b>Pvalue</b> |
|---------------|----------------|---------------|---------------|
| 2.248874      | 0.029146       | 59.14674      | 0.206         |
| NA            | NA             |               |               |
| 2.410699      | 0.0198         | 52.07101      | 0.429         |
| NA            | NA             |               |               |
| 2.000636      | 0.051105       | 52.79369      | 0.384         |
| NA            | NA             |               |               |
| 2.000636      | 0.037421       | 51.58076      | 0.427         |
| NA            | NA             |               |               |
| 2.851075      | 0.006405       | 51.19173      | 0.427         |
| NA            | NA             |               |               |
| 2.972352      | 0.004609       | 45.93771      | 0.671         |
| NA            | NA             |               |               |
| -2.39449      | 0.020597       | 41.26963      | 0.812         |
| NA            | NA             |               |               |
| 2.021807      | 0.04879        | 52.33868      | 0.4           |
| NA            | NA             |               |               |
